# Supplementary material for: Benefits of Thromboelastography and Thrombin Generation Assay for Bleeding Prediction in Patients With Thrombocytopenia or Hematologic Malignancies
Source: PubMed Central journal article supplement — Ann Lab Med. 2017 Aug 16;37(6):484–93. doi: 10.3343/alm.2017.37.6.484 (PMC5587820; doi:10.3343/alm.2017.37.6.484), 2017-08-16
Supplement: alm-37-484-s002.pdf [file alm-37-484-s002.pdf]

**Supplemental Table S2.** Diagnostic performance of laboratory parameters for prediction of World Health Organization bleeding grade  $\geq 2$ .

|          | Cut off                 | Sensitivity (%) | Specificity (%) | PPV  | NPV  | AUC ( <i>P</i> value) |
|----------|-------------------------|-----------------|-----------------|------|------|-----------------------|
| MA       | $\leq 40.8$ mmHg        | 59.3            | 80.8            | 45.7 | 87.9 | 0.718 (<0.001)        |
| K        | $> 2.5$ min             | 80.8            | 55.7            | 32.8 | 81.5 | 0.693 (0.002)         |
| ETP      | $\leq 573$ nM·min       | 76.9            | 50.5            | 29.3 | 89.3 | 0.651 (0.014)         |
| Platelet | $\leq 19 \times 10^9/L$ | 59.3            | 84.8            | 51.6 | 88.4 | 0.740 (<0.001)        |
| PT       | $\leq 11.3$ sec         | 69.2            | 51.5            | 27.3 | 86.4 | 0.586 (0.163)         |

The receiver operating characteristic (ROC) curves for determining WHO grade  $\geq 2$  bleeding were performed for platelet counts and TEG and TGA parameters and were used to calculate the area under the curve (AUC). *P* values of AUC tested the null hypothesis that the AUC equals 0.50. The cutoff values were determined as the values producing the best diagnostic accuracy.

Abbreviations: AUC, area under the concentration curve; ETP, endogenous thrombin potential; K, coagulation time; MA, maximum amplitude; NPV, negative predictive value; PPV, positive predictive value; PT, prothrombin time.
