# Supplementary material for: Benefits of Thromboelastography and Thrombin Generation Assay for Bleeding Prediction in Patients With Thrombocytopenia or Hematologic Malignancies
Source: PubMed Central journal article supplement — Ann Lab Med. 2017 Aug 16;37(6):484–93. doi: 10.3343/alm.2017.37.6.484 (PMC5587820; doi:10.3343/alm.2017.37.6.484), 2017-08-16
Supplement: alm-37-484-s003.pdf [file alm-37-484-s003.pdf]

**Supplemental Table S3.** Coagulation and anticoagulation factor levels according to WHO bleeding grade in patients with severe thrombocytopenia (platelet count  $\leq 10 \times 10^9/L$ )

| Factors            | Total patients with platelet $\leq 10 \times 10^9/L$ (n = 13) | WHO bleeding grade $\geq 2$ (n = 7) | WHO bleeding grade 0 or 1 (n = 6) | P value* |
|--------------------|---------------------------------------------------------------|-------------------------------------|-----------------------------------|----------|
| Fibrinogen (mg/dL) | 311.2 (185.2-390.7)                                           | 281.9 (185.2-345.9)                 | 323.6 (265.8-390.7)               | 0.153    |
| Factor II (%)      | 86.2 (74.3-116.0)                                             | 86.2 (74.3-113.2)                   | 94.7 (75.7-116.0)                 | 0.668    |
| Factor V (%)       | 108.2 (75.8-138.3)                                            | 109.9 (86.3-138.3)                  | 91.9 (75.8-118.2)                 | 0.074    |
| Factor VII (%)     | 113.7 (57.9-153.1)                                            | 113.7 (57.9-124.5)                  | 112.2 (93.2-153.1)                | 0.253    |
| Factor VIII (%)    | 135.8 (91.6-230.5)                                            | 114.0 (91.6-154.9)                  | 149.4 (94.8-230.5)                | 0.199    |
| Factor IX (%)      | 116.1 (51.1-150.2)                                            | 115.0 (51.1-150.2)                  | 119.5 (100.7-146.9)               | 0.391    |
| Factor X (%)       | 75.0 (57.3-113.7)                                             | 74.8 (57.3-113.7)                   | 82.2 (67.8-112.4)                 | 0.568    |
| Factor XI (%)      | 83.0 (57.0-127.4)                                             | 83.0 (63.3-127.4)                   | 73.8 (57.0-124.1)                 | 0.391    |
| Factor XII (%)     | 60.0 (34.9-129.8)                                             | 63.9 (40.8-129.8)                   | 55.1 (34.9-74.6)                  | 0.568    |
| AT (%)             | 81.4 (67.5-124.6)                                             | 90.8 (67.5-106.0)                   | 79.1 (67.7-124.6)                 | 0.775    |
| PC (%)             | 117.9 (57.9-148.2)                                            | 92.6 (57.9-148.2)                   | 118.9 (90.6-130.2)                | 0.568    |
| PS (%)             | 86.7 (52.3-179.8)                                             | 86.7 (71.9-102.7)                   | 86.6 (52.3-179.8)                 | 0.999    |

\*P value: Man-Whitney *U* test for results from patients with WHO bleeding grading  $\geq 2$  or those with WHO bleeding grade 0 or 1.

Values are expressed as median (range).

Abbreviations: AT, antithrombin; PC, protein C; PS, protein S.
