# Supplementary material for: Benefits of Thromboelastography and Thrombin Generation Assay for Bleeding Prediction in Patients With Thrombocytopenia or Hematologic Malignancies
Source: PubMed Central journal article supplement — Ann Lab Med. 2017 Aug 16;37(6):484–93. doi: 10.3343/alm.2017.37.6.484 (PMC5587820; doi:10.3343/alm.2017.37.6.484), 2017-08-16
Supplement: alm-37-484-s004.pdf [file alm-37-484-s004.pdf]

**Supplemental Table S4.** Logistic regression analysis results of laboratory parameters for prediction of bleeding in patients with hematologic malignancies (n=44)

| Variables                                                               | WHO bleeding            |                         |                      | Logistic regression analysis   |              |                                           |              |
|-------------------------------------------------------------------------|-------------------------|-------------------------|----------------------|--------------------------------|--------------|-------------------------------------------|--------------|
|                                                                         | Grade $\geq 2^*$        | Grade 0 or 1*           | P-value <sup>†</sup> | Unadjusted odds ratio (95% CI) | P-value      | Adjusted odds ratio <sup>‡</sup> (95% CI) | P-value      |
| <b>Total patents (n = 44)</b>                                           |                         |                         |                      |                                |              |                                           |              |
| MA (mmHg)                                                               | <b>34.4 (25.2–67.1)</b> | <b>53.4 (17.4–78.0)</b> | <b>0.036</b>         | <b>0.94 (0.88–0.99)</b>        | <b>0.028</b> | <b>0.95 (0.89–1.02)</b>                   | <b>0.174</b> |
| K (min)                                                                 | <b>2.6 (1.1–8.9)</b>    | <b>2.0 (0.8–13.8)</b>   | <b>0.029</b>         | <b>1.24 (0.92–1.74)</b>        | <b>0.154</b> | <b>1.16 (0.87–1.59)</b>                   | <b>0.295</b> |
| ETP (nM·min)                                                            | 530.1 (138.9–840.4)     | 629.4 (85.1–1,962.8)    | 0.216                | 0.99 (0.99–1.00)               | 0.183        | 0.99 (0.99–1.00)                          | 0.463        |
| Platelet ( $\times 10^9/L$ )                                            | 18 (5–93)               | 38 (2–345)              | 0.059                | 0.98 (0.95–1.00)               | 0.077        | NA                                        | NA           |
| PT (sec)                                                                | 11.3 (10.1–16.9)        | 12.5 (10.8–17.5)        | 0.181                | 0.82 (0.48–1.26)               | 0.416        | 0.87 (0.51–1.36)                          | 0.598        |
| <b>Patients with platelet <math>\leq 20 \times 10^9</math> (n = 14)</b> |                         |                         |                      |                                |              |                                           |              |
| MA (mmHg)                                                               | <b>31.1 (25.2–57.8)</b> | <b>42.3 (30.5–65.0)</b> | <b>0.053</b>         | <b>0.92 (0.80–1.02)</b>        | <b>0.128</b> | <b>0.84 (0.62–0.98)</b>                   | <b>0.019</b> |
| K (min)                                                                 | <b>3.9 (1.9–8.9)</b>    | <b>2.3 (1.1–3.2)</b>    | <b>0.038</b>         | <b>3.77 (1.11–35.0)</b>        | <b>0.021</b> | <b>6.60 (1.31–733.11)</b>                 | <b>0.019</b> |
| ETP (nM·min)                                                            | 469.2 (138.9–840.4)     | 645.6 (488.3–791.3)     | 0.121                | 0.99 (0.98–1.00)               | 0.095        | 0.99 (0.98–1.00)                          | 0.078        |
| Platelet ( $\times 10^9/L$ )                                            | 9 (5–19)                | 10 (2–18)               | 0.746                | 1.05 (0.86–1.31)               | 0.650        | NA                                        | NA           |
| PT (sec)                                                                | 12.7 (11.0–16.9)        | 11.8 (10.9–13.3)        | 0.518                | 1.58 (0.73–4.43)               | 0.306        | 1.71 (0.61–6.43)                          | 0.388        |
| <b>Patients with platelet <math>&gt; 20 \times 10^9</math> (n = 30)</b> |                         |                         |                      |                                |              |                                           |              |
| MA (mmHg)                                                               | 47.1 (39.8–67.1)        | 55.1 (17.4–78.0)        | 0.580                | 0.99 (0.91–1.08)               | 0.671        | 1.02 (0.85–1.40)                          | 0.923        |
| K (min)                                                                 | 2.6 (1.1–2.6)           | 1.9 (0.8–13.8)          | 0.693                | 0.93 (0.27–1.52)               | 0.876        | 0.67 (0.03–1.53)                          | 0.833        |
| ETP (nM·min)                                                            | 573.4 (293.0–771.0)     | 588.5 (85.1–1,962.8)    | 0.756                | 0.99 (0.99–1.00)               | 0.739        | 1.00 (0.99–1.00)                          | 0.769        |
| Platelet ( $\times 10^9/L$ )                                            | 55 (43–93)              | 56 (21–345)             | 0.917                | 0.99 (0.97–1.01)               | 0.773        | NA                                        | NA           |
| <b>PT (sec)</b>                                                         | <b>11.0 (10.1–11.3)</b> | <b>12.6 (10.8–17.5)</b> | <b>0.012</b>         | <b>0.06 (&lt;0.01–0.64)</b>    | <b>0.006</b> | <b>0.60 (&lt;0.01–1.07)</b>               | <b>0.154</b> |

\*Values are expressed as median (range); <sup>†</sup>P value: Man-Whitney U test for results from patients with WHO bleeding grading  $\geq 2$  or those with WHO bleeding grade 0 or 1; <sup>‡</sup>Platelet count was adjusted.

Abbreviations: MA, maximum amplitude; K, coagulation time; ETP, endogenous thrombin potential; PT, prothrombin time.
